# Supplementary material for: Kinetic Ultrasound-Assisted Extraction as a Sustainable Approach for the Recovery of Phenolics Accumulated through UVA Treatment in Strawberry By-Products
Source: MDPI journal article supplement (doi:10.3390/foods12162989), 2023-08-08
Supplement: s1 [file s1]

## Supplementary Material

**Table S1.** Compositions of simulated gastrointestinal phases.

| Reactive                                 | Salival<br>fluid<br>(SF) | Gastric phase<br>(GF) | Intestinal Phase<br>(IF) | Duodenal<br>Phase (DF) |
|------------------------------------------|--------------------------|-----------------------|--------------------------|------------------------|
| Deionized water<br>(mL)                  | 500                      | 500                   | 500                      | 500                    |
| NaCl (g)                                 | 0.0585                   | 2.752                 | 7.012                    | 5.259                  |
| KCl (g)                                  | 0.0745                   | 0.824                 | 0.564                    | 0.376                  |
| NaHCO <sub>3</sub> (g)                   | 1.05                     |                       | 3.388                    | 5.785                  |
| Urea (g)                                 | 0.2                      | 0.085                 | 0.1                      | 0.25                   |
| NaH <sub>2</sub> PO <sub>4</sub> (g)     |                          | 0.266                 |                          |                        |
| CaCl <sub>2</sub> ·2H <sub>2</sub> O (g) |                          | 0.399                 |                          |                        |
| NH <sub>4</sub> Cl (g)                   |                          | 0.306                 |                          |                        |
| HCl (mL)                                 |                          | 6.5                   | 0.18                     | 0.15                   |
| KH <sub>2</sub> PO <sub>4</sub> (g)      |                          |                       | 0.08                     |                        |
| MgCl <sub>2</sub> (g)                    |                          |                       | 0.05                     |                        |
| <b>Enzymes</b>                           |                          |                       |                          |                        |
| $\alpha$ -Amylase (g)                    | 1                        |                       |                          |                        |
| Pepsin (g)                               |                          | 2.5                   |                          |                        |
| Pancreatin (g)                           |                          |                       | 9                        |                        |
| Lipase (g)                               |                          |                       | 1.5                      |                        |
| Bile Salt (g)                            |                          |                       |                          | 8.2                    |

**Table S2.** ANOVA for the influence of process condition on the kinetic parameters of Peleg's model constant.

| Variation Source    | DG | K1   | K2   |
|---------------------|----|------|------|
| X1                  | 1  | *    | *    |
| X2                  | 1  | *    | *    |
| X3                  | 1  | *    | *    |
| X1*X2               | 1  | ns   | *    |
| X1*X3               | 1  | ***  | **   |
| X2*X3               | 1  | *    | *    |
| X1 <sup>2</sup>     | 1  | ns   | *    |
| X2 <sup>2</sup>     | 1  | *    | ***  |
| X3 <sup>2</sup>     | 1  | ns   | ns   |
| X1*X2*X3            | 1  | ns   | ns   |
| X1 <sup>2</sup> *X2 | 1  | ns   | ***  |
| X1 <sup>2</sup> *X3 | 1  | ns   | ns   |
| X1*X2 <sup>2</sup>  | 1  | ns   | ns   |
| X1*X3 <sup>2</sup>  | 1  | ns   | **   |
| X2 <sup>2</sup> *X3 | 1  | ns   | ns   |
| X2*X3 <sup>2</sup>  | 1  | ns   | ns   |
| R <sup>2</sup>      | -  | 0.87 | 0.99 |
| Lack of Fit         | 14 | ns   | ns   |

X1: Solid-Liquid ratio (w/v). X2: Ethanol concentration (%v/v). X3: Ultrasound probe percent power (%). DG: degree of freedom. \*:  $p \leq 0.05$ ; \*\*:  $p \leq 0.01$ ; \*\*\*:  $p \leq 0.001$ . ns:  $p > 0.05$ .
